# Supplementary material for: Identifying Knowledge Gaps through the Systematic Review of Temperature-Driven Variability in the Competence of Aedes aegypti and Ae. albopictus for Chikungunya Virus
Source: MDPI journal article supplement (doi:10.3390/pathogens12111368), 2023-11-18
Supplement: s1 [file s1]

**Supplemental Information: Identifying knowledge gaps through the systematic review of temperature-driven variability in the competence of *Aedes aegypti* and *Ae. albopictus* for chikungunya virus**

RC Christofferson et al.

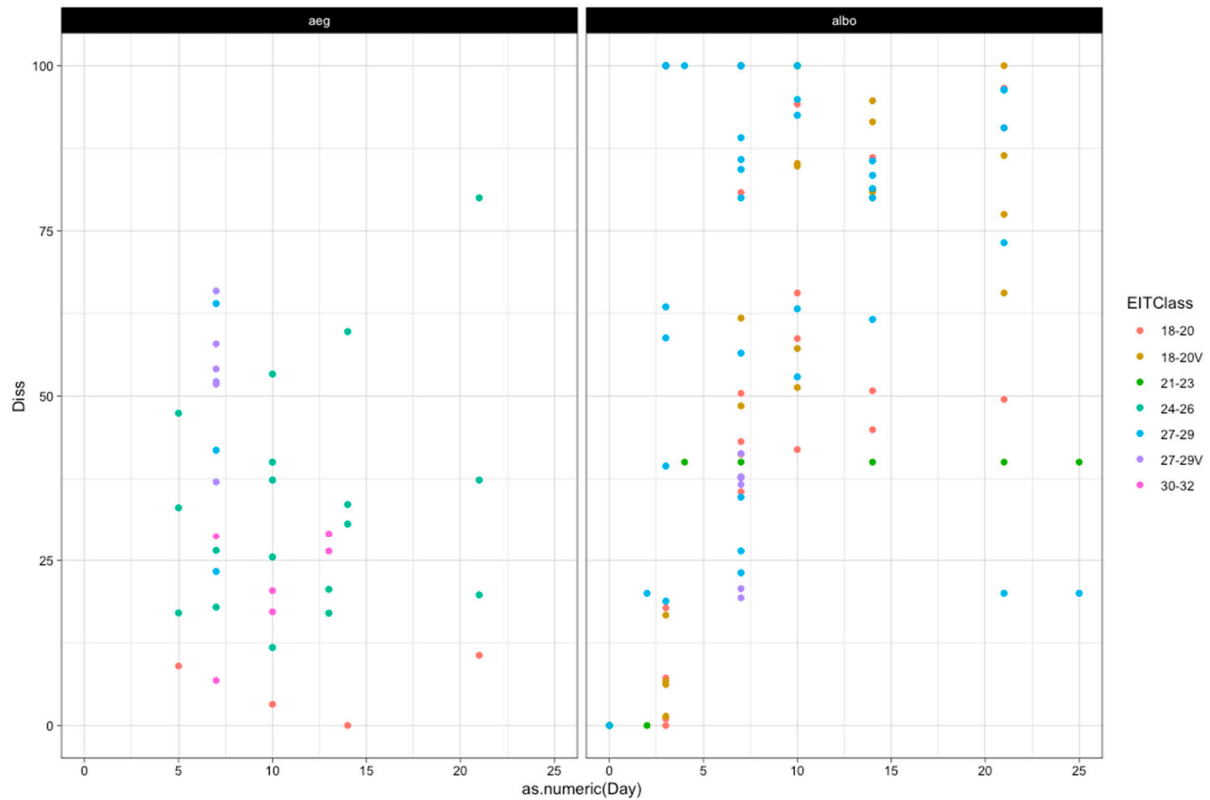

**Supplemental Figure S1: Data Summary:** A scatterplot of all data points collated from the papers included in this systematic review.

**Supplemental Table S1: Data Summary.** Summary of the day-by-day dissemination of CHIKV with respect to EITClass and species.

| EITClass | Species | Day Post Exposure | Mean Dissemination | Number of data points |
|----------|---------|-------------------|--------------------|-----------------------|
| 18-20    | aeg     | 5                 | 9                  | 1                     |
| 18-20    | aeg     | 10                | 3.209877           | 1                     |
| 18-20    | aeg     | 21                | 10.617284          | 1                     |
| 18-20    | albo    | 3                 | 45.2               | 5                     |
| 18-20    | albo    | 7                 | 68.3               | 6                     |
| 18-20    | albo    | 10                | 65.1               | 4                     |
| 18-20    | albo    | 14                | 65.45              | 4                     |
| 18-20    | albo    | 21                | 83.3               | 4                     |
| 18-20 V  | albo    | 3                 | 7.75               | 4                     |
| 18-20 V  | albo    | 7                 | 47.3               | 4                     |
| 18-20 V  | albo    | 10                | 69.625             | 4                     |
| 18-20 V  | albo    | 14                | 87.075             | 4                     |
| 18-20 V  | albo    | 21                | 82.375             | 4                     |
| 21-23    | albo    | 4                 | 40                 | 1                     |
| 21-23    | albo    | 7                 | 40                 | 1                     |
| 21-23    | albo    | 10                | 100                | 1                     |
| 21-23    | albo    | 14                | 40                 | 1                     |
| 21-23    | albo    | 21                | 40                 | 1                     |
| 21-23    | albo    | 25                | 40                 | 1                     |
| 24-26    | aeg     | 5                 | 32.510288          | 3                     |
| 24-26    | aeg     | 7                 | 22.2               | 2                     |
| 24-26    | aeg     | 10                | 33.583456          | 5                     |
| 24-26    | aeg     | 13                | 18.8               | 2                     |
| 24-26    | aeg     | 14                | 41.316872          | 3                     |
| 24-26    | aeg     | 21                | 45.679012          | 3                     |
| 27-29    | aeg     | 7                 | 43.033333          | 3                     |
| 27-29    | albo    | 2                 | 20                 | 1                     |
| 27-29    | albo    | 3                 | 63.416667          | 6                     |
| 27-29    | albo    | 4                 | 100                | 1                     |
| 27-29    | albo    | 7                 | 67.99              | 10                    |
| 27-29    | albo    | 10                | 80.7               | 5                     |
| 27-29    | albo    | 14                | 78.4               | 5                     |
| 27-29    | albo    | 21                | 75.3               | 5                     |
| 27-29    | albo    | 25                | 20                 | 1                     |

|         |      |    |           |   |
|---------|------|----|-----------|---|
| 27-29 V | aeg  | 7  | 53.15     | 6 |
| 27-29 V | albo | 7  | 32.216667 | 6 |
| 30-32   | aeg  | 7  | 17.75     | 2 |
| 30-32   | aeg  | 10 | 18.8      | 2 |
| 30-32   | aeg  | 13 | 27.75     | 2 |

**Table S2: Model Transition Rates Summary:** Events and corresponding transition rates in the stochastic SEIR-SEI model. For each event, we list only those states that change. Parameter values are given in the main text and in Tables 2-3 .

| Event                               | Change in state                               | Transition rate                 |
|-------------------------------------|-----------------------------------------------|---------------------------------|
| Transmission from mosquito to human | $(S_h, E_h) \rightarrow (S_h - 1, E_h + 1)$   | $a * S_h * \frac{I_M}{N_H}$     |
| Onset of infectiousness in human    | $(E_h, I_D1) \rightarrow (E_h - 1, I_D + 1)$  | $\sigma * E_H$                  |
| Recovery in human                   | $(I_D1, R_h) \rightarrow (I_D1 - 1, R_h + 1)$ | $\gamma I_H$                    |
| Adult (female) mosquito recruitment | $(S_m) \rightarrow (S_m + 1)$                 | $E_M$                           |
| Susceptible mosquito death          | $(S_m) \rightarrow (S_m - 1)$                 | $\mu_M S_M$                     |
| Transmission from human to mosquito | $(S_m, E_m) \rightarrow (S_m - 1, E_m + 1)$   | $a * S_M * \frac{I_H}{N_H} * b$ |
| Exposed mosquito death              | $(E_m) \rightarrow (E_m - 1)$                 | $\mu * E_M$                     |
| Onset of infectiousness in mosquito | $(E_m, I_m) \rightarrow (E_m - 1, I_m + 1)$   | $EIP * E_M$                     |
| Infectious mosquito death           | $(I_m) \rightarrow (I_m - 1)$                 | $\mu * I_M$                     |
